# Supplementary material for: Ruxolitinib Combined with Gemcitabine against Cholangiocarcinoma Growth via the JAK2/STAT1/3/ALDH1A3 Pathway
Source: Biomedicines. 2021 Jul 24;9(8):885. doi: 10.3390/biomedicines9080885 (PMC8389680; doi:10.3390/biomedicines9080885)
Supplement: Supplementary file 1 [file biomedicines-09-00885-s001.zip › Table S1. Transcription factors prediction by JAK2 inhibitor.xls]

## Sheet: 工作表1
Upstream Regulator	Exp Fold Change	Molecule Type	Predicted Activation State	Activation z-score	p-value of overlap	Target molecules in dataset	Mechanistic Network
TP53		transcription regulator	Inhibited	-2.245	4.65E-09	APBB2,ASXL1,CAV2,CCNL1,CDC42BPA,CDC42EP3,DUSP6,EDN1,EGR1,IFI16,INHBA,LIMA1,MCL1,MYL4,MYO10,MYO6,MYOF,NAMPT,NFATC2IP,PLAUR,PMEPA1,SLC6A6,STAG1,STAT1,TGFB2,THBD,TNFAIP8,TNFRSF10B,TNFSF10,VDR,XAF1,ZMAT3	74 (16)
TP53		transcription regulator		-0.706	4.65E-09	APBB2,ASXL1,CAV2,CCNL1,CDC42BPA,CDC42EP3,DUSP6,EDN1,EGR1,IFI16,INHBA,LIMA1,MCL1,MYL4,MYO10,MYO6,MYOF,NAMPT,NFATC2IP,PLAUR,PMEPA1,SLC6A6,STAG1,STAT1,TGFB2,THBD,TNFAIP8,TNFRSF10B,TNFSF10,VDR,XAF1,ZMAT3	74 (16)
NR3C1		ligand-dependent nuclear receptor		-1.809	1.28E-08	ABHD2,BARD1,BCL10,CDC42EP3,CDKN1C,EDN1,EGR1,EMP1,GADD45B,IFIH1,INHBA,MCL1,NAMPT,PDCD4,STAT3,THBD,TLE3,TNFAIP8,TNFRSF10B,VDR,ZNF704	81 (16)
NR3C1		ligand-dependent nuclear receptor		-1.809	1.28E-08	ABHD2,BARD1,BCL10,CDC42EP3,CDKN1C,EDN1,EGR1,EMP1,GADD45B,IFIH1,INHBA,MCL1,NAMPT,PDCD4,STAT3,THBD,TLE3,TNFAIP8,TNFRSF10B,VDR,ZNF704	81 (16)
RXRA		ligand-dependent nuclear receptor			3.91E-02	CLMN,PLD1,TGFB2,THBD,TNFRSF10B
RXRA		ligand-dependent nuclear receptor			3.91E-02	CLMN,PLD1,TGFB2,THBD,TNFRSF10B
RELA		transcription regulator		-1.069	5.91E-03	BCL10,CARD8,EDN1,EGR1,NAMPT,OAS2,PLD1,TNFRSF10B	72 (14)
RELA		transcription regulator		-1.446	5.91E-03	BCL10,CARD8,EDN1,EGR1,NAMPT,OAS2,PLD1,TNFRSF10B	72 (14)
HIF1A		transcription regulator		0.346	1.94E-02	CD24,EDN1,GADD45B,MCL1,PLAUR,STAT3,TGFB2
HIF1A		transcription regulator		-0.577	1.94E-02	CD24,EDN1,GADD45B,MCL1,PLAUR,STAT3,TGFB2
SRF		transcription regulator			9.79E-03	EGR1,FST,MALAT1,MCL1,MYL4,NR4A2,ODF2L
SRF		transcription regulator			9.79E-03	EGR1,FST,MALAT1,MCL1,MYL4,NR4A2,ODF2L
TCF4		transcription regulator		-0.728	1.47E-03	CD24,CDKN1C,EDN1,STAT3
TCF4		transcription regulator		-1.954	1.47E-03	CD24,CDKN1C,EDN1,STAT3
FOXP3		transcription regulator			3.05E-02	CHAF1A,DUSP6,PDCD4
FOXP3		transcription regulator			3.05E-02	CHAF1A,DUSP6,PDCD4
ATF1		transcription regulator			3.36E-02	EGR1,INHBA
ATF1		transcription regulator			3.36E-02	EGR1,INHBA
SP1		transcription regulator	Inhibited	-2.412	5.23E-04	ABHD2,CYP1B1,EGR1,EIF2AK2,MCL1,PLAUR,STAT1,TGFB2,THBD,TNFRSF10B,TNFSF10,VDR	84 (16)
SP1		transcription regulator		-1.706	5.23E-04	ABHD2,CYP1B1,EGR1,EIF2AK2,MCL1,PLAUR,STAT1,TGFB2,THBD,TNFRSF10B,TNFSF10,VDR	84 (16)
STAT1	-1.708	transcription regulator	Inhibited	-3.062	1.01E-05	APOL6,EDN1,EGR1,EIF2AK2,IFI16,OAS2,SP110,STAT1,STAT2,TNFRSF10B,TNFSF10	63 (13)
STAT1	-1.784	transcription regulator	Inhibited	-2.326	1.01E-05	APOL6,EDN1,EGR1,EIF2AK2,IFI16,OAS2,SP110,STAT1,STAT2,TNFRSF10B,TNFSF10	63 (13)
IRF1		transcription regulator		-1.942	1.96E-05	DST,EIF2AK2,IFIH1,OAS2,STAT1,STAT2,STAT3,TNFSF10	59 (12)
IRF1		transcription regulator		-1.942	1.96E-05	DST,EIF2AK2,IFIH1,OAS2,STAT1,STAT2,STAT3,TNFSF10	59 (12)
NFATC2		transcription regulator	Inhibited	-2.828	1.16E-05	BBX,DAB2,EDN1,HELZ2,INHBA,PLD1,STAT1,STAT2	39 (7)
NFATC2		transcription regulator	Inhibited	-2.121	1.16E-05	BBX,DAB2,EDN1,HELZ2,INHBA,PLD1,STAT1,STAT2	39 (7)
NFATC1		transcription regulator		-1.067	2.67E-03	CYP1B1,EDN1,PAG1,TNFSF10
NFATC1		transcription regulator		-1.067	2.67E-03	CYP1B1,EDN1,PAG1,TNFSF10
JUN		transcription regulator		-0.186	3.23E-02	CYP1B1,EDN1,IFI16,PLAUR,SLC6A6,STAT1,VDR
JUN		transcription regulator		-0.186	3.23E-02	CYP1B1,EDN1,IFI16,PLAUR,SLC6A6,STAT1,VDR
