# Supplementary material for: Ruxolitinib Combined with Gemcitabine against Cholangiocarcinoma Growth via the JAK2/STAT1/3/ALDH1A3 Pathway
Source: Biomedicines. 2021 Jul 24;9(8):885. doi: 10.3390/biomedicines9080885 (PMC8389680; doi:10.3390/biomedicines9080885)
Supplement: Supplementary file 1 [file biomedicines-09-00885-s001.zip › Table S2. JAK2 canonical pathway.xls]

## Sheet: Low dose v.s. control
Retinoic acid Mediated Apoptosis Signaling	2.88E00	6.56E-02	-2.000	TNFRSF10B,ZC3HAV1,TNFSF10,TNKS2
Pancreatic Adenocarcinoma Signaling	2.63E00	4.24E-02	-2.000	NAPEPLD,TGFB2,STAT3,STAT1,PLD1
Death Receptor Signaling	2.23E00	4.35E-02	-2.000	TNFRSF10B,ZC3HAV1,TNFSF10,TNKS2
Tec Kinase Signaling	1.97E00	2.94E-02	-2.000	TNFRSF10B,TNFSF10,STAT2,STAT3,STAT1
Endothelin-1 Signaling	1.23E00	2.14E-02	-1.000	ADCY9,NAPEPLD,EDN1,PLD1
Colorectal Cancer Metastasis Signaling	8.93E-01	1.62E-02	-1.000	ADCY9,TGFB2,STAT3,STAT1
TGF-β Signaling	3.22E00	5.75E-02	NaN	TGFB2,BMPR2,VDR,INHBA,PMEPA1
Role of JAK1, JAK2 and TYK2 in Interferon Signaling	3.08E00	1.25E-01	NaN	STAT2,STAT3,STAT1
VDR/RXR Activation	2.49E00	5.13E-02	NaN	SERPINB1,TGFB2,VDR,THBD
Choline Biosynthesis III	2.35E00	1.54E-01	NaN	NAPEPLD,PLD1
Activation of IRF by Cytosolic Pattern Recognition Receptors	1.9E00	4.84E-02	NaN	IFIH1,STAT2,STAT1
IL-22 Signaling	1.83E00	8.33E-02	NaN	STAT3,STAT1
Role of JAK family kinases in IL-6-type Cytokine Signaling	1.79E00	8E-02	NaN	STAT3,STAT1
Role of Pattern Recognition Receptors in Recognition of Bacteria and Viruses	1.65E00	2.92E-02	NaN	IFIH1,OAS2,TGFB2,EIF2AK2
JAK/Stat Signaling	1.57E00	3.61E-02	NaN	STAT2,STAT3,STAT1
Epithelial Adherens Junction Signaling	1.56E00	2.74E-02	NaN	TGFB2,BMPR2,MYL4,CTNND1
Oncostatin M Signaling	1.54E00	5.88E-02	NaN	STAT3,STAT1
Role of JAK2 in Hormone-like Cytokine Signaling	1.54E00	5.88E-02	NaN	STAT3,STAT1
FLT3 Signaling in Hematopoietic Progenitor Cells	1.54E00	3.53E-02	NaN	STAT2,STAT3,STAT1
HIPPO signaling	1.53E00	3.49E-02	NaN	WWC1,AJUBA,WWTR1
Coagulation System	1.52E00	5.71E-02	NaN	PLAUR,THBD
Interferon Signaling	1.49E00	5.56E-02	NaN	STAT2,STAT1
PDGF Signaling	1.48E00	3.33E-02	NaN	STAT3,EIF2AK2,STAT1
Role of PKR in Interferon Induction and Antiviral Response	1.41E00	5E-02	NaN	EIF2AK2,STAT1
Tight Junction Signaling	1.38E00	2.4E-02	NaN	CPSF6,CLDN23,TGFB2,MYL4
UVA-Induced MAPK Signaling	1.34E00	2.94E-02	NaN	ZC3HAV1,TNKS2,STAT1
NAD Biosynthesis III	1.34E00	1.67E-01	NaN	NAMPT
Triacylglycerol Degradation	1.34E00	4.55E-02	NaN	ABHD6,ABHD2
IL-9 Signaling	1.32E00	4.44E-02	NaN	STAT3,STAT1
PPARα/RXRα Activation	1.29E00	2.25E-02	NaN	ADCY9,HELZ2,TGFB2,BMPR2
Hepatic Fibrosis / Hepatic Stellate Cell Activation	1.26E00	2.19E-02	NaN	EDN1,TGFB2,MYL4,STAT1
p53 Signaling	1.25E00	2.7E-02	NaN	GADD45B,STAG1,TNFRSF10B
Renin-Angiotensin Signaling	1.17E00	2.5E-02	NaN	ADCY9,STAT3,STAT1
RhoA Signaling	1.15E00	2.46E-02	NaN	MYL4,CDC42EP3,PLD1
Phospholipases	1.07E00	3.23E-02	NaN	NAPEPLD,PLD1
CNTF Signaling	1.06E00	3.17E-02	NaN	STAT3,STAT1
Cleavage and Polyadenylation of Pre-mRNA	1.05E00	8.33E-02	NaN	CPSF6
Acyl-CoA Hydrolysis	1.05E00	8.33E-02	NaN	THEM4
Thrombopoietin Signaling	1.04E00	3.08E-02	NaN	STAT3,STAT1
Hypoxia Signaling in the Cardiovascular System	1.04E00	3.08E-02	NaN	UBE2G2,EDN1
cAMP-mediated signaling	1.02E00	1.81E-02	NaN	AKAP2,ADCY9,DUSP6,STAT3
EGF Signaling	1.01E00	2.94E-02	NaN	STAT3,STAT1
Human Embryonic Stem Cell Pluripotency	9.94E-01	2.1E-02	NaN	TGFB2,BMPR2,INHBA
DNA Double-Strand Break Repair by Homologous Recombination	9.84E-01	7.14E-02	NaN	ATRX
DNA Double-Strand Break Repair by Non-Homologous End Joining	9.84E-01	7.14E-02	NaN	XRCC4
T Helper Cell Differentiation	9.74E-01	2.82E-02	NaN	STAT3,STAT1
Role of JAK1 and JAK3 in γc Cytokine Signaling	9.74E-01	2.82E-02	NaN	STAT3,STAT1
Telomere Extension by Telomerase	9.55E-01	6.67E-02	NaN	TNKS2
STAT3 Pathway	9.54E-01	2.74E-02	NaN	BMPR2,STAT3
GM-CSF Signaling	9.54E-01	2.74E-02	NaN	STAT3,STAT1
Phospholipase C Signaling	9.4E-01	1.69E-02	NaN	ADCY9,NAPEPLD,MYL4,PLD1
Extrinsic Prothrombin Activation Pathway	9.29E-01	6.25E-02	NaN	THBD
BMP signaling pathway	9.25E-01	2.63E-02	NaN	FST,BMPR2
Role of BRCA1 in DNA Damage Response	9.07E-01	2.56E-02	NaN	BARD1,STAT1
Regulation of IL-2 Expression in Activated and Anergic T Lymphocytes	8.98E-01	2.53E-02	NaN	BCL10,TGFB2
Growth Hormone Signaling	8.8E-01	2.47E-02	NaN	STAT3,STAT1
IL-3 Signaling	8.63E-01	2.41E-02	NaN	STAT3,STAT1
Prolactin Signaling	8.63E-01	2.41E-02	NaN	STAT3,STAT1
GADD45 Signaling	8.59E-01	5.26E-02	NaN	GADD45B
CXCR4 Signaling	8.58E-01	1.82E-02	NaN	ADCY9,EGR1,MYL4
Leptin Signaling in Obesity	8.47E-01	2.35E-02	NaN	ADCY9,STAT3
Cardiomyocyte Differentiation via BMP Receptors	8.39E-01	5E-02	NaN	BMPR2
Wnt/β-catenin Signaling	8.36E-01	1.78E-02	NaN	TLE3,TGFB2,BMPR2
Factors Promoting Cardiogenesis in Vertebrates	7.92E-01	2.17E-02	NaN	TGFB2,BMPR2
Fcγ Receptor-mediated Phagocytosis in Macrophages and Monocytes	7.85E-01	2.15E-02	NaN	NAPEPLD,PLD1
NF-κB Signaling	7.79E-01	1.67E-02	NaN	BCL10,BMPR2,EIF2AK2
B Cell Receptor Signaling	7.55E-01	1.62E-02	NaN	BCL10,PAG1,EGR1
Bupropion Degradation	7.5E-01	4E-02	NaN	CYP1B1
CDK5 Signaling	7.43E-01	2.02E-02	NaN	ADCY9,EGR1
Regulation of the Epithelial-Mesenchymal Transition Pathway	7.36E-01	1.59E-02	NaN	EGR1,TGFB2,STAT3
Antiproliferative Role of TOB in T Cell Signaling	7.34E-01	3.85E-02	NaN	TGFB2
Glucocorticoid Receptor Signaling	7.29E-01	1.39E-02	NaN	CDKN1C,TGFB2,STAT3,STAT1
Protein Kinase A Signaling	7.22E-01	1.28E-02	NaN	AKAP2,ADCY9,DUSP6,TGFB2,MYL4
IL-15 Production	7.2E-01	3.7E-02	NaN	STAT1
Acetone Degradation I (to Methylglyoxal)	7.2E-01	3.7E-02	NaN	CYP1B1
Antioxidant Action of Vitamin C	7.17E-01	1.94E-02	NaN	NAPEPLD,PLD1
Clathrin-mediated Endocytosis Signaling	7E-01	1.52E-02	NaN	MYO6,PICALM,DAB2
Mouse Embryonic Stem Cell Pluripotency	6.98E-01	1.89E-02	NaN	BMPR2,STAT3
Intrinsic Prothrombin Activation Pathway	6.92E-01	3.45E-02	NaN	THBD
ERK/MAPK Signaling	6.92E-01	1.51E-02	NaN	DUSP6,STAT3,STAT1
T Cell Receptor Signaling	6.8E-01	1.83E-02	NaN	BCL10,PAG1
p38 MAPK Signaling	6.35E-01	1.71E-02	NaN	TGFB2,STAT1
Gαi Signaling	6.19E-01	1.67E-02	NaN	ADCY9,STAT3
Stearate Biosynthesis I (Animals)	6.09E-01	2.78E-02	NaN	THEM4
Role of NANOG in Mammalian Embryonic Stem Cell Pluripotency	6.08E-01	1.64E-02	NaN	BMPR2,STAT3
Role of Tissue Factor in Cancer	6.08E-01	1.64E-02	NaN	EGR1,PLAUR
tRNA Splicing	5.99E-01	2.7E-02	NaN	TSEN15
PI3K/AKT Signaling	5.98E-01	1.61E-02	NaN	MCL1,THEM4
IL-6 Signaling	5.84E-01	1.57E-02	NaN	STAT3,MCL1
Estrogen Biosynthesis	5.79E-01	2.56E-02	NaN	CYP1B1
GNRH Signaling	5.74E-01	1.55E-02	NaN	ADCY9,EGR1
Transcriptional Regulatory Network in Embryonic Stem Cells	5.7E-01	2.5E-02	NaN	STAT3
Cellular Effects of Sildenafil (Viagra)	5.7E-01	1.54E-02	NaN	ADCY9,MYL4
Cardiac Hypertrophy Signaling	5.56E-01	1.28E-02	NaN	ADCY9,TGFB2,MYL4
Cardiac β-adrenergic Signaling	5.47E-01	1.48E-02	NaN	AKAP2,ADCY9
Role of RIG1-like Receptors in Antiviral Innate Immunity	5.43E-01	2.33E-02	NaN	IFIH1
Serotonin Receptor Signaling	5.43E-01	2.33E-02	NaN	ADCY9
iNOS Signaling	5.35E-01	2.27E-02	NaN	STAT1
Triacylglycerol Biosynthesis	5.35E-01	2.27E-02	NaN	PLPP3
Aryl Hydrocarbon Receptor Signaling	5.25E-01	1.43E-02	NaN	TGFB2,CYP1B1
Signaling by Rho Family GTPases	5.18E-01	1.21E-02	NaN	MYL4,CDC42EP3,PLD1
Hereditary Breast Cancer Signaling	5.17E-01	1.41E-02	NaN	GADD45B,BARD1
IL-12 Signaling and Production in Macrophages	5.01E-01	1.37E-02	NaN	TGFB2,STAT1
Protein Ubiquitination Pathway	4.94E-01	1.18E-02	NaN	UBE2G2,DNAJB9,NEDD4L
Molecular Mechanisms of Cancer	4.76E-01	1.07E-02	NaN	ADCY9,TGFB2,BMPR2,CTNND1
Nicotine Degradation III	4.62E-01	1.85E-02	NaN	CYP1B1
Unfolded protein response	4.62E-01	1.85E-02	NaN	DNAJB9
G-Protein Coupled Receptor Signaling	4.53E-01	1.11E-02	NaN	ADCY9,DUSP6,STAT3
Hepatic Cholestasis	4.53E-01	1.26E-02	NaN	ADCY9,TGFB2
Gαq Signaling	4.49E-01	1.25E-02	NaN	NAPEPLD,PLD1
ATM Signaling	4.31E-01	1.69E-02	NaN	GADD45B
Cdc42 Signaling	4.26E-01	1.2E-02	NaN	CDC42BPA,MYL4
Melatonin Degradation I	4.14E-01	1.61E-02	NaN	CYP1B1
Nicotine Degradation II	4.09E-01	1.59E-02	NaN	CYP1B1
Germ Cell-Sertoli Cell Junction Signaling	4.07E-01	1.16E-02	NaN	TGFB2,CTNND1
Pyridoxal 5'-phosphate Salvage Pathway	4.04E-01	1.56E-02	NaN	EIF2AK2
Cell Cycle: G1/S Checkpoint Regulation	4.04E-01	1.56E-02	NaN	TGFB2
Calcium Signaling	3.92E-01	1.12E-02	NaN	MYL4,TPM1
Superpathway of Melatonin Degradation	3.89E-01	1.49E-02	NaN	CYP1B1
GABA Receptor Signaling	3.89E-01	1.49E-02	NaN	ADCY9
IL-10 Signaling	3.84E-01	1.47E-02	NaN	STAT3
Remodeling of Epithelial Adherens Junctions	3.84E-01	1.47E-02	NaN	CTNND1
ErbB2-ErbB3 Signaling	3.79E-01	1.45E-02	NaN	STAT3
Glioma Invasiveness Signaling	3.74E-01	1.43E-02	NaN	PLAUR
GPCR-Mediated Integration of Enteroendocrine Signaling Exemplified by an L Cell	3.65E-01	1.39E-02	NaN	ADCY9
Agranulocyte Adhesion and Diapedesis	3.62E-01	1.06E-02	NaN	CLDN23,MYL4
RAR Activation	3.59E-01	1.05E-02	NaN	ADCY9,TGFB2
Dendritic Cell Maturation	3.59E-01	1.05E-02	NaN	STAT2,STAT1
Toll-like Receptor Signaling	3.56E-01	1.35E-02	NaN	EIF2AK2
Role of NFAT in Cardiac Hypertrophy	3.54E-01	1.04E-02	NaN	ADCY9,TGFB2
TREM1 Signaling	3.52E-01	1.33E-02	NaN	STAT3
IL-15 Signaling	3.48E-01	1.32E-02	NaN	STAT3
IL-17A Signaling in Airway Cells	3.44E-01	1.3E-02	NaN	STAT3
Dopamine Receptor Signaling	3.44E-01	1.3E-02	NaN	ADCY9
IL-8 Signaling	3.41E-01	1.02E-02	NaN	NAPEPLD,PLD1
CD40 Signaling	3.39E-01	1.28E-02	NaN	STAT3
Cyclins and Cell Cycle Regulation	3.39E-01	1.28E-02	NaN	TGFB2
mTOR Signaling	3.36E-01	1.01E-02	NaN	NAPEPLD,PLD1
Axonal Guidance Signaling	3.34E-01	8.93E-03	NaN	ADAM23,MYL4,SRGAP2,SLIT2
Thrombin Signaling	3.27E-01	9.85E-03	NaN	ADCY9,MYL4
GPCR-Mediated Nutrient Sensing in Enteroendocrine Cells	3.13E-01	1.18E-02	NaN	ADCY9
Leukocyte Extravasation Signaling	3.11E-01	9.52E-03	NaN	CLDN23,CTNND1
NF-κB Activation by Viruses	3.09E-01	1.16E-02	NaN	EIF2AK2
α-Adrenergic Signaling	3.06E-01	1.15E-02	NaN	ADCY9
G Beta Gamma Signaling	3.02E-01	1.14E-02	NaN	CAV2
Crosstalk between Dendritic Cells and Natural Killer Cells	2.99E-01	1.12E-02	NaN	TNFSF10
Apoptosis Signaling	2.99E-01	1.12E-02	NaN	MCL1
FGF Signaling	2.95E-01	1.11E-02	NaN	STAT3
Regulation of Actin-based Motility by Rho	2.92E-01	1.1E-02	NaN	MYL4
Acute Myeloid Leukemia Signaling	2.92E-01	1.1E-02	NaN	STAT3
IL-1 Signaling	2.92E-01	1.1E-02	NaN	ADCY9
Salvage Pathways of Pyrimidine Ribonucleotides	2.86E-01	1.08E-02	NaN	EIF2AK2
Melanocyte Development and Pigmentation Signaling	2.79E-01	1.05E-02	NaN	ADCY9
FAK Signaling	2.67E-01	1.01E-02	NaN	ASAP1
PAK Signaling	2.62E-01	9.9E-03	NaN	MYL4
Chronic Myeloid Leukemia Signaling	2.53E-01	9.62E-03	NaN	TGFB2
IGF-1 Signaling	2.48E-01	9.43E-03	NaN	STAT3
Gαs Signaling	2.4E-01	9.17E-03	NaN	ADCY9
Oxidative Phosphorylation	2.4E-01	9.17E-03	NaN	ATP5S
Type I Diabetes Mellitus Signaling	2.38E-01	9.09E-03	NaN	STAT1
Corticotropin Releasing Hormone Signaling	2.35E-01	9.01E-03	NaN	ADCY9
HIF1α Signaling	2.26E-01	8.7E-03	NaN	EDN1
HGF Signaling	2.26E-01	8.7E-03	NaN	STAT3
Rac Signaling	2.21E-01	8.55E-03	NaN	PLD1
PTEN Signaling	2.17E-01	8.4E-03	NaN	BMPR2
Sphingosine-1-phosphate Signaling	2.1E-01	8.2E-03	NaN	ADCY9
Gustation Pathway	2.1E-01	8.2E-03	NaN	ADCY9
PI3K Signaling in B Lymphocytes	1.98E-01	7.81E-03	NaN	BCL10
Estrogen Receptor Signaling	1.98E-01	7.81E-03	NaN	SPEN
Ingenuity Canonical Pathways	-log(p-value)	Ratio	z-score	Molecules

## Sheet: High dose v.s. control
Ingenuity Canonical Pathways	-log(p-value)	Ratio	z-score	Molecules
TGF-β Signaling	3.22E00	5.75E-02	NaN	TGFB2,BMPR2,VDR,INHBA,PMEPA1
Role of JAK1, JAK2 and TYK2 in Interferon Signaling	3.08E00	1.25E-01	NaN	STAT2,STAT3,STAT1
Retinoic acid Mediated Apoptosis Signaling	2.88E00	6.56E-02	0.000	TNFRSF10B,ZC3HAV1,TNFSF10,TNKS2
Pancreatic Adenocarcinoma Signaling	2.63E00	4.24E-02	-2.000	NAPEPLD,TGFB2,STAT3,STAT1,PLD1
VDR/RXR Activation	2.49E00	5.13E-02	NaN	SERPINB1,TGFB2,VDR,THBD
Choline Biosynthesis III	2.35E00	1.54E-01	NaN	NAPEPLD,PLD1
Death Receptor Signaling	2.23E00	4.35E-02	0.000	TNFRSF10B,ZC3HAV1,TNFSF10,TNKS2
Tec Kinase Signaling	1.97E00	2.94E-02	-1.000	TNFRSF10B,TNFSF10,STAT2,STAT3,STAT1
Activation of IRF by Cytosolic Pattern Recognition Receptors	1.9E00	4.84E-02	NaN	IFIH1,STAT2,STAT1
IL-22 Signaling	1.83E00	8.33E-02	NaN	STAT3,STAT1
Role of JAK family kinases in IL-6-type Cytokine Signaling	1.79E00	8E-02	NaN	STAT3,STAT1
Role of Pattern Recognition Receptors in Recognition of Bacteria and Viruses	1.65E00	2.92E-02	NaN	IFIH1,OAS2,TGFB2,EIF2AK2
JAK/Stat Signaling	1.57E00	3.61E-02	NaN	STAT2,STAT3,STAT1
Epithelial Adherens Junction Signaling	1.56E00	2.74E-02	NaN	TGFB2,BMPR2,MYL4,CTNND1
Oncostatin M Signaling	1.54E00	5.88E-02	NaN	STAT3,STAT1
Role of JAK2 in Hormone-like Cytokine Signaling	1.54E00	5.88E-02	NaN	STAT3,STAT1
FLT3 Signaling in Hematopoietic Progenitor Cells	1.54E00	3.53E-02	NaN	STAT2,STAT3,STAT1
HIPPO signaling	1.53E00	3.49E-02	NaN	WWC1,AJUBA,WWTR1
Coagulation System	1.52E00	5.71E-02	NaN	PLAUR,THBD
Interferon Signaling	1.49E00	5.56E-02	NaN	STAT2,STAT1
PDGF Signaling	1.48E00	3.33E-02	NaN	STAT3,EIF2AK2,STAT1
Role of PKR in Interferon Induction and Antiviral Response	1.41E00	5E-02	NaN	EIF2AK2,STAT1
Tight Junction Signaling	1.38E00	2.4E-02	NaN	CPSF6,CLDN23,TGFB2,MYL4
UVA-Induced MAPK Signaling	1.34E00	2.94E-02	NaN	ZC3HAV1,TNKS2,STAT1
NAD Biosynthesis III	1.34E00	1.67E-01	NaN	NAMPT
Triacylglycerol Degradation	1.34E00	4.55E-02	NaN	ABHD6,ABHD2
IL-9 Signaling	1.32E00	4.44E-02	NaN	STAT3,STAT1
PPARα/RXRα Activation	1.29E00	2.25E-02	NaN	ADCY9,HELZ2,TGFB2,BMPR2
Hepatic Fibrosis / Hepatic Stellate Cell Activation	1.26E00	2.19E-02	NaN	EDN1,TGFB2,MYL4,STAT1
p53 Signaling	1.25E00	2.7E-02	NaN	GADD45B,STAG1,TNFRSF10B
Endothelin-1 Signaling	1.23E00	2.14E-02	-1.000	ADCY9,NAPEPLD,EDN1,PLD1
Renin-Angiotensin Signaling	1.17E00	2.5E-02	NaN	ADCY9,STAT3,STAT1
RhoA Signaling	1.15E00	2.46E-02	NaN	MYL4,CDC42EP3,PLD1
Phospholipases	1.07E00	3.23E-02	NaN	NAPEPLD,PLD1
CNTF Signaling	1.06E00	3.17E-02	NaN	STAT3,STAT1
Cleavage and Polyadenylation of Pre-mRNA	1.05E00	8.33E-02	NaN	CPSF6
Acyl-CoA Hydrolysis	1.05E00	8.33E-02	NaN	THEM4
Thrombopoietin Signaling	1.04E00	3.08E-02	NaN	STAT3,STAT1
Hypoxia Signaling in the Cardiovascular System	1.04E00	3.08E-02	NaN	UBE2G2,EDN1
cAMP-mediated signaling	1.02E00	1.81E-02	NaN	AKAP2,ADCY9,DUSP6,STAT3
EGF Signaling	1.01E00	2.94E-02	NaN	STAT3,STAT1
Human Embryonic Stem Cell Pluripotency	9.94E-01	2.1E-02	NaN	TGFB2,BMPR2,INHBA
DNA Double-Strand Break Repair by Homologous Recombination	9.84E-01	7.14E-02	NaN	ATRX
DNA Double-Strand Break Repair by Non-Homologous End Joining	9.84E-01	7.14E-02	NaN	XRCC4
T Helper Cell Differentiation	9.74E-01	2.82E-02	NaN	STAT3,STAT1
Role of JAK1 and JAK3 in γc Cytokine Signaling	9.74E-01	2.82E-02	NaN	STAT3,STAT1
Telomere Extension by Telomerase	9.55E-01	6.67E-02	NaN	TNKS2
STAT3 Pathway	9.54E-01	2.74E-02	NaN	BMPR2,STAT3
GM-CSF Signaling	9.54E-01	2.74E-02	NaN	STAT3,STAT1
Phospholipase C Signaling	9.4E-01	1.69E-02	NaN	ADCY9,NAPEPLD,MYL4,PLD1
Extrinsic Prothrombin Activation Pathway	9.29E-01	6.25E-02	NaN	THBD
BMP signaling pathway	9.25E-01	2.63E-02	NaN	FST,BMPR2
Role of BRCA1 in DNA Damage Response	9.07E-01	2.56E-02	NaN	BARD1,STAT1
Regulation of IL-2 Expression in Activated and Anergic T Lymphocytes	8.98E-01	2.53E-02	NaN	BCL10,TGFB2
Colorectal Cancer Metastasis Signaling	8.93E-01	1.62E-02	-1.000	ADCY9,TGFB2,STAT3,STAT1
Growth Hormone Signaling	8.8E-01	2.47E-02	NaN	STAT3,STAT1
IL-3 Signaling	8.63E-01	2.41E-02	NaN	STAT3,STAT1
Prolactin Signaling	8.63E-01	2.41E-02	NaN	STAT3,STAT1
GADD45 Signaling	8.59E-01	5.26E-02	NaN	GADD45B
CXCR4 Signaling	8.58E-01	1.82E-02	NaN	ADCY9,EGR1,MYL4
Leptin Signaling in Obesity	8.47E-01	2.35E-02	NaN	ADCY9,STAT3
Cardiomyocyte Differentiation via BMP Receptors	8.39E-01	5E-02	NaN	BMPR2
Wnt/β-catenin Signaling	8.36E-01	1.78E-02	NaN	TLE3,TGFB2,BMPR2
Factors Promoting Cardiogenesis in Vertebrates	7.92E-01	2.17E-02	NaN	TGFB2,BMPR2
Fcγ Receptor-mediated Phagocytosis in Macrophages and Monocytes	7.85E-01	2.15E-02	NaN	NAPEPLD,PLD1
NF-κB Signaling	7.79E-01	1.67E-02	NaN	BCL10,BMPR2,EIF2AK2
B Cell Receptor Signaling	7.55E-01	1.62E-02	NaN	BCL10,PAG1,EGR1
Bupropion Degradation	7.5E-01	4E-02	NaN	CYP1B1
CDK5 Signaling	7.43E-01	2.02E-02	NaN	ADCY9,EGR1
Regulation of the Epithelial-Mesenchymal Transition Pathway	7.36E-01	1.59E-02	NaN	EGR1,TGFB2,STAT3
Antiproliferative Role of TOB in T Cell Signaling	7.34E-01	3.85E-02	NaN	TGFB2
Glucocorticoid Receptor Signaling	7.29E-01	1.39E-02	NaN	CDKN1C,TGFB2,STAT3,STAT1
Protein Kinase A Signaling	7.22E-01	1.28E-02	NaN	AKAP2,ADCY9,DUSP6,TGFB2,MYL4
IL-15 Production	7.2E-01	3.7E-02	NaN	STAT1
Acetone Degradation I (to Methylglyoxal)	7.2E-01	3.7E-02	NaN	CYP1B1
Antioxidant Action of Vitamin C	7.17E-01	1.94E-02	NaN	NAPEPLD,PLD1
Clathrin-mediated Endocytosis Signaling	7E-01	1.52E-02	NaN	MYO6,PICALM,DAB2
Mouse Embryonic Stem Cell Pluripotency	6.98E-01	1.89E-02	NaN	BMPR2,STAT3
Intrinsic Prothrombin Activation Pathway	6.92E-01	3.45E-02	NaN	THBD
ERK/MAPK Signaling	6.92E-01	1.51E-02	NaN	DUSP6,STAT3,STAT1
T Cell Receptor Signaling	6.8E-01	1.83E-02	NaN	BCL10,PAG1
p38 MAPK Signaling	6.35E-01	1.71E-02	NaN	TGFB2,STAT1
Gαi Signaling	6.19E-01	1.67E-02	NaN	ADCY9,STAT3
Stearate Biosynthesis I (Animals)	6.09E-01	2.78E-02	NaN	THEM4
Role of NANOG in Mammalian Embryonic Stem Cell Pluripotency	6.08E-01	1.64E-02	NaN	BMPR2,STAT3
Role of Tissue Factor in Cancer	6.08E-01	1.64E-02	NaN	EGR1,PLAUR
tRNA Splicing	5.99E-01	2.7E-02	NaN	TSEN15
PI3K/AKT Signaling	5.98E-01	1.61E-02	NaN	MCL1,THEM4
IL-6 Signaling	5.84E-01	1.57E-02	NaN	STAT3,MCL1
Estrogen Biosynthesis	5.79E-01	2.56E-02	NaN	CYP1B1
GNRH Signaling	5.74E-01	1.55E-02	NaN	ADCY9,EGR1
Transcriptional Regulatory Network in Embryonic Stem Cells	5.7E-01	2.5E-02	NaN	STAT3
Cellular Effects of Sildenafil (Viagra)	5.7E-01	1.54E-02	NaN	ADCY9,MYL4
Cardiac Hypertrophy Signaling	5.56E-01	1.28E-02	NaN	ADCY9,TGFB2,MYL4
Cardiac β-adrenergic Signaling	5.47E-01	1.48E-02	NaN	AKAP2,ADCY9
Role of RIG1-like Receptors in Antiviral Innate Immunity	5.43E-01	2.33E-02	NaN	IFIH1
Serotonin Receptor Signaling	5.43E-01	2.33E-02	NaN	ADCY9
iNOS Signaling	5.35E-01	2.27E-02	NaN	STAT1
Triacylglycerol Biosynthesis	5.35E-01	2.27E-02	NaN	PLPP3
Aryl Hydrocarbon Receptor Signaling	5.25E-01	1.43E-02	NaN	TGFB2,CYP1B1
Signaling by Rho Family GTPases	5.18E-01	1.21E-02	NaN	MYL4,CDC42EP3,PLD1
Hereditary Breast Cancer Signaling	5.17E-01	1.41E-02	NaN	GADD45B,BARD1
IL-12 Signaling and Production in Macrophages	5.01E-01	1.37E-02	NaN	TGFB2,STAT1
Protein Ubiquitination Pathway	4.94E-01	1.18E-02	NaN	UBE2G2,DNAJB9,NEDD4L
Molecular Mechanisms of Cancer	4.76E-01	1.07E-02	NaN	ADCY9,TGFB2,BMPR2,CTNND1
Nicotine Degradation III	4.62E-01	1.85E-02	NaN	CYP1B1
Unfolded protein response	4.62E-01	1.85E-02	NaN	DNAJB9
G-Protein Coupled Receptor Signaling	4.53E-01	1.11E-02	NaN	ADCY9,DUSP6,STAT3
Hepatic Cholestasis	4.53E-01	1.26E-02	NaN	ADCY9,TGFB2
Gαq Signaling	4.49E-01	1.25E-02	NaN	NAPEPLD,PLD1
ATM Signaling	4.31E-01	1.69E-02	NaN	GADD45B
Cdc42 Signaling	4.26E-01	1.2E-02	NaN	CDC42BPA,MYL4
Melatonin Degradation I	4.14E-01	1.61E-02	NaN	CYP1B1
Nicotine Degradation II	4.09E-01	1.59E-02	NaN	CYP1B1
Germ Cell-Sertoli Cell Junction Signaling	4.07E-01	1.16E-02	NaN	TGFB2,CTNND1
Pyridoxal 5'-phosphate Salvage Pathway	4.04E-01	1.56E-02	NaN	EIF2AK2
Cell Cycle: G1/S Checkpoint Regulation	4.04E-01	1.56E-02	NaN	TGFB2
Calcium Signaling	3.92E-01	1.12E-02	NaN	MYL4,TPM1
Superpathway of Melatonin Degradation	3.89E-01	1.49E-02	NaN	CYP1B1
GABA Receptor Signaling	3.89E-01	1.49E-02	NaN	ADCY9
IL-10 Signaling	3.84E-01	1.47E-02	NaN	STAT3
Remodeling of Epithelial Adherens Junctions	3.84E-01	1.47E-02	NaN	CTNND1
ErbB2-ErbB3 Signaling	3.79E-01	1.45E-02	NaN	STAT3
Glioma Invasiveness Signaling	3.74E-01	1.43E-02	NaN	PLAUR
GPCR-Mediated Integration of Enteroendocrine Signaling Exemplified by an L Cell	3.65E-01	1.39E-02	NaN	ADCY9
Agranulocyte Adhesion and Diapedesis	3.62E-01	1.06E-02	NaN	CLDN23,MYL4
RAR Activation	3.59E-01	1.05E-02	NaN	ADCY9,TGFB2
Dendritic Cell Maturation	3.59E-01	1.05E-02	NaN	STAT2,STAT1
Toll-like Receptor Signaling	3.56E-01	1.35E-02	NaN	EIF2AK2
Role of NFAT in Cardiac Hypertrophy	3.54E-01	1.04E-02	NaN	ADCY9,TGFB2
TREM1 Signaling	3.52E-01	1.33E-02	NaN	STAT3
IL-15 Signaling	3.48E-01	1.32E-02	NaN	STAT3
IL-17A Signaling in Airway Cells	3.44E-01	1.3E-02	NaN	STAT3
Dopamine Receptor Signaling	3.44E-01	1.3E-02	NaN	ADCY9
IL-8 Signaling	3.41E-01	1.02E-02	NaN	NAPEPLD,PLD1
CD40 Signaling	3.39E-01	1.28E-02	NaN	STAT3
Cyclins and Cell Cycle Regulation	3.39E-01	1.28E-02	NaN	TGFB2
mTOR Signaling	3.36E-01	1.01E-02	NaN	NAPEPLD,PLD1
Axonal Guidance Signaling	3.34E-01	8.93E-03	NaN	ADAM23,MYL4,SRGAP2,SLIT2
Thrombin Signaling	3.27E-01	9.85E-03	NaN	ADCY9,MYL4
GPCR-Mediated Nutrient Sensing in Enteroendocrine Cells	3.13E-01	1.18E-02	NaN	ADCY9
Leukocyte Extravasation Signaling	3.11E-01	9.52E-03	NaN	CLDN23,CTNND1
NF-κB Activation by Viruses	3.09E-01	1.16E-02	NaN	EIF2AK2
α-Adrenergic Signaling	3.06E-01	1.15E-02	NaN	ADCY9
G Beta Gamma Signaling	3.02E-01	1.14E-02	NaN	CAV2
Crosstalk between Dendritic Cells and Natural Killer Cells	2.99E-01	1.12E-02	NaN	TNFSF10
Apoptosis Signaling	2.99E-01	1.12E-02	NaN	MCL1
FGF Signaling	2.95E-01	1.11E-02	NaN	STAT3
Regulation of Actin-based Motility by Rho	2.92E-01	1.1E-02	NaN	MYL4
Acute Myeloid Leukemia Signaling	2.92E-01	1.1E-02	NaN	STAT3
IL-1 Signaling	2.92E-01	1.1E-02	NaN	ADCY9
Salvage Pathways of Pyrimidine Ribonucleotides	2.86E-01	1.08E-02	NaN	EIF2AK2
Melanocyte Development and Pigmentation Signaling	2.79E-01	1.05E-02	NaN	ADCY9
FAK Signaling	2.67E-01	1.01E-02	NaN	ASAP1
PAK Signaling	2.62E-01	9.9E-03	NaN	MYL4
Chronic Myeloid Leukemia Signaling	2.53E-01	9.62E-03	NaN	TGFB2
IGF-1 Signaling	2.48E-01	9.43E-03	NaN	STAT3
Gαs Signaling	2.4E-01	9.17E-03	NaN	ADCY9
Oxidative Phosphorylation	2.4E-01	9.17E-03	NaN	ATP5S
Type I Diabetes Mellitus Signaling	2.38E-01	9.09E-03	NaN	STAT1
Corticotropin Releasing Hormone Signaling	2.35E-01	9.01E-03	NaN	ADCY9
HIF1α Signaling	2.26E-01	8.7E-03	NaN	EDN1
HGF Signaling	2.26E-01	8.7E-03	NaN	STAT3
Rac Signaling	2.21E-01	8.55E-03	NaN	PLD1
PTEN Signaling	2.17E-01	8.4E-03	NaN	BMPR2
Sphingosine-1-phosphate Signaling	2.1E-01	8.2E-03	NaN	ADCY9
Gustation Pathway	2.1E-01	8.2E-03	NaN	ADCY9
PI3K Signaling in B Lymphocytes	1.98E-01	7.81E-03	NaN	BCL10
Estrogen Receptor Signaling	1.98E-01	7.81E-03	NaN	SPEN
